# Supplementary material for: Needles in a haystack: H-bonding in an optogenetic protein observed with isotope labeling and 2D-IR spectroscopy
Source: Royal Society of Chemistry journal article supplement (doi:10.1039/d1cp00996f), 2021-01-01
Supplement: d1cp00996f1.pdf [file d1cp00996f1.pdf]

# Supporting Information to: Needles in a Haystack: H-bonding in an Optogenetic Protein observed with Isotope labeling and 2D-IR Spectroscopy

Jeannette Ruf, Peter Hamm and David Buhrke\*  
*Department of Chemistry, University of Zürich, Zürich, Switzerland*  
\*david.buhrke@chem.uzh.ch

March 30, 2021

## Contents

|   |                                             |   |
|---|---------------------------------------------|---|
| 1 | 2D-IR spectra of isotope normal AmI-g2      | 1 |
| 2 | Remaining Pr contribution in the Pg spectra | 2 |

  

|   |                                        |
|---|----------------------------------------|
| 1 | 2D-IR spectra of isotope normal AmI-g2 |
|---|----------------------------------------|

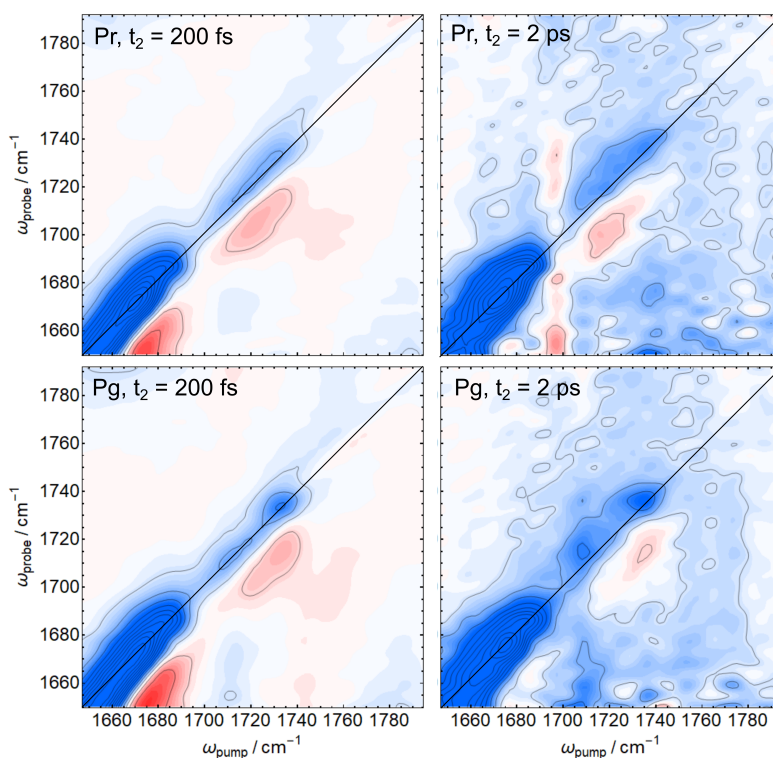

Figure 1: 2D-IR spectra of isotope-normal AmI-g2 in the Pr (top) and Pg (bottom) states at  $t_2 = 200$  fs (left) and 2 ps (right).

## 2 Remaining Pr contribution in the Pg spectra

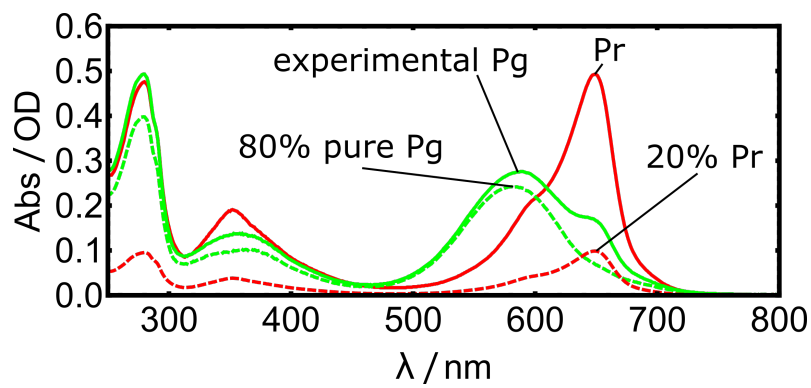

Figure 2: Decomposition of the experimental Pg spectrum indicates that the contribution of residual Pr is less than 20%.
